# Supplementary material
Source: MDPI journal article supplement (https://www.mdpi.com/2073-4441/16/8/1162)

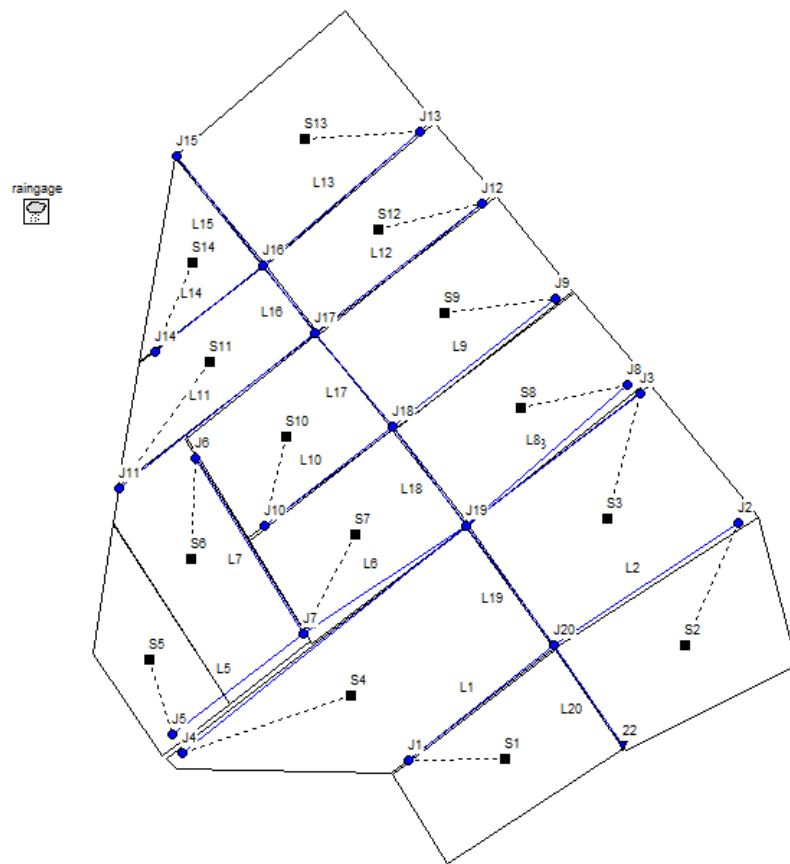

Figure S1. SWMM model construction graph.

Supplement: s1 [file s1]
